# Supplementary material for: Inorganic anion-aided coordination of lanthanide metal ions to cucurbituril and supramolecular self-assembly: potential applications in the separation of light lanthanides
Source: Royal Society of Chemistry journal article supplement (doi:10.1039/c3ce40568k), 2013-01-01
Supplement: c3ce40568k.pdf [file c3ce40568k.pdf]

# Inorganic Anion-aided Coordination of Lanthanide Metal Ions to Cucurbituril and Supramolecular Self- Assembly: Potential Application in Separation of Light Lanthanides

Yi Zhao, Li-Li Liang, Kai Chen, \* Ting Zhang, Xin Xiao, Yun-Qian Zhang, Zhu Tao, Sai-Feng Xue,  
Qian-Jiang Zhu \*

Key Laboratory of Macrocyclic and Supramolecular Chemistry of Guizhou Province, Guizhou  
University, Guiyang 550025, China

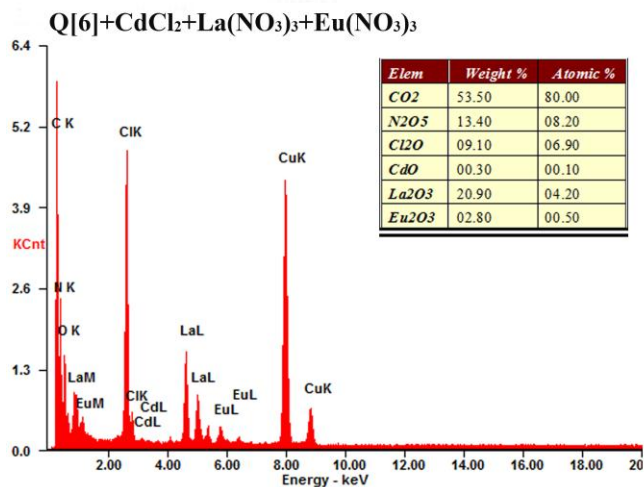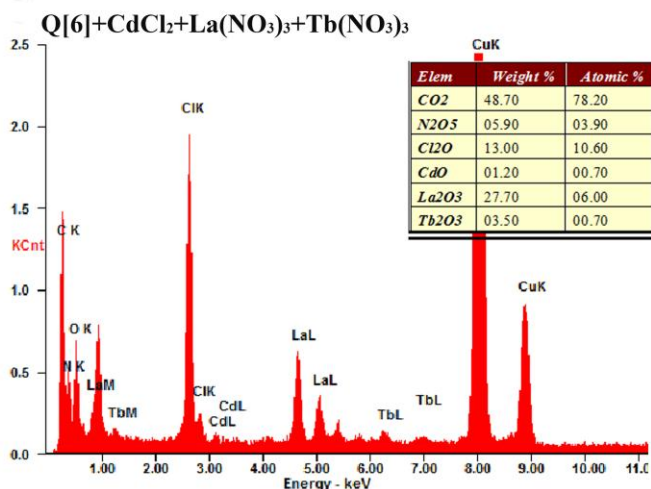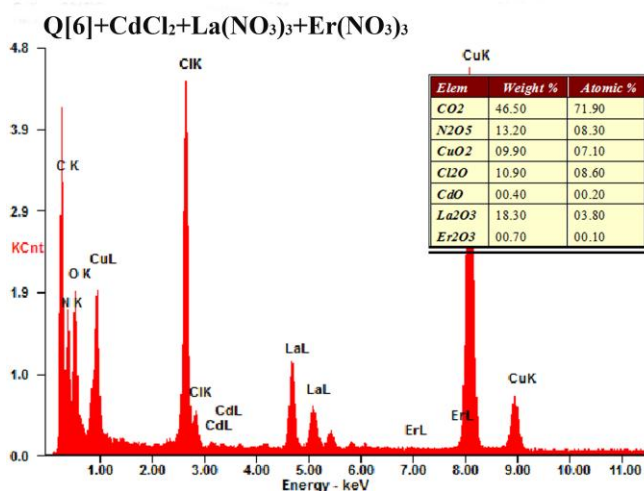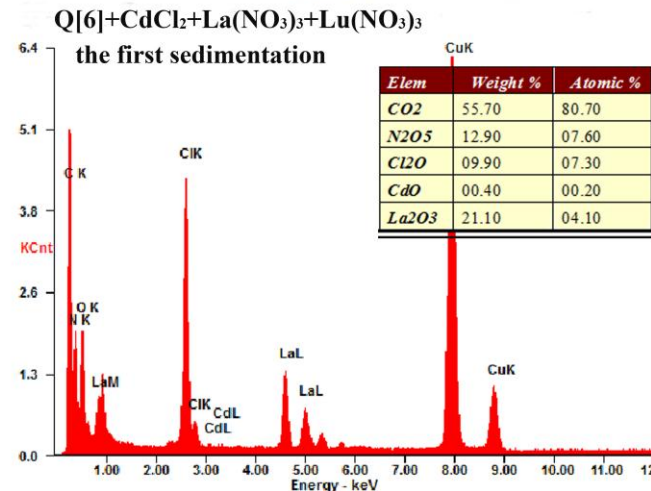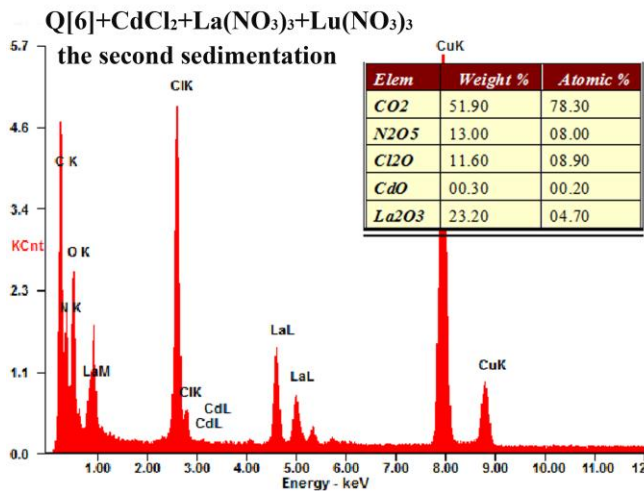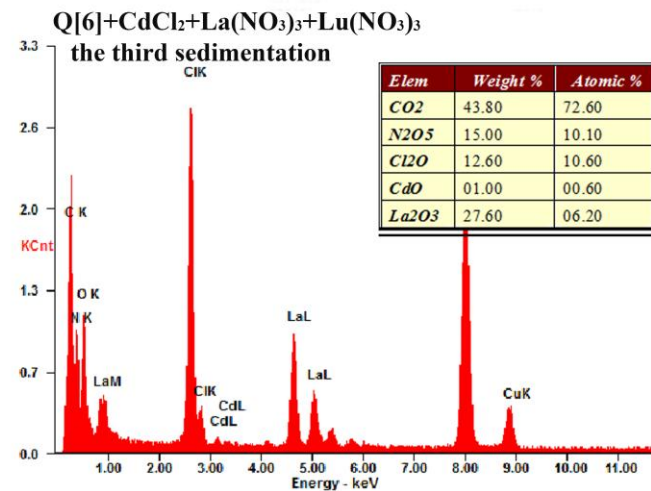

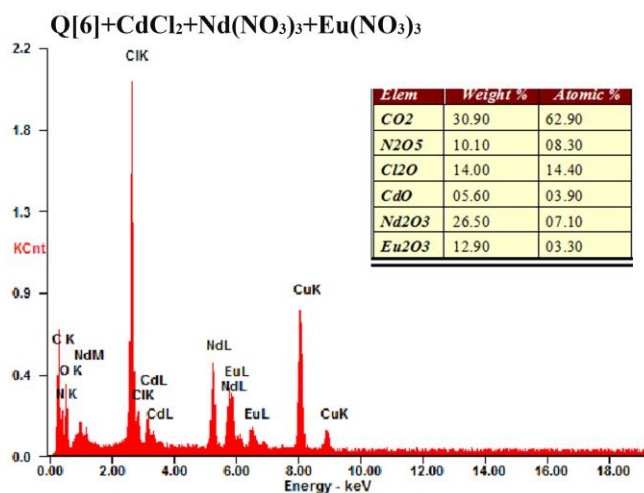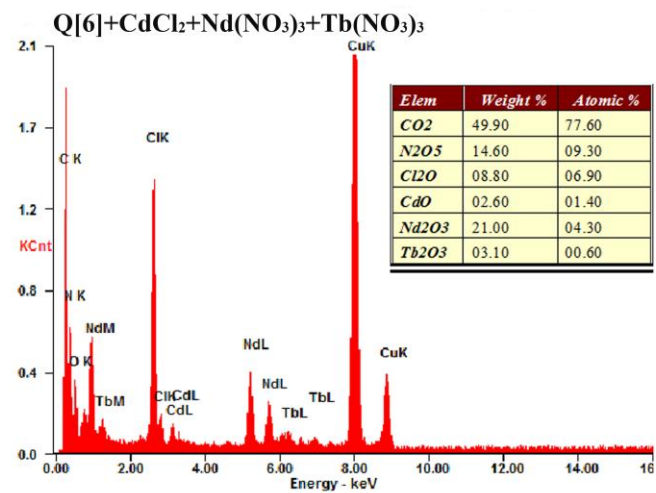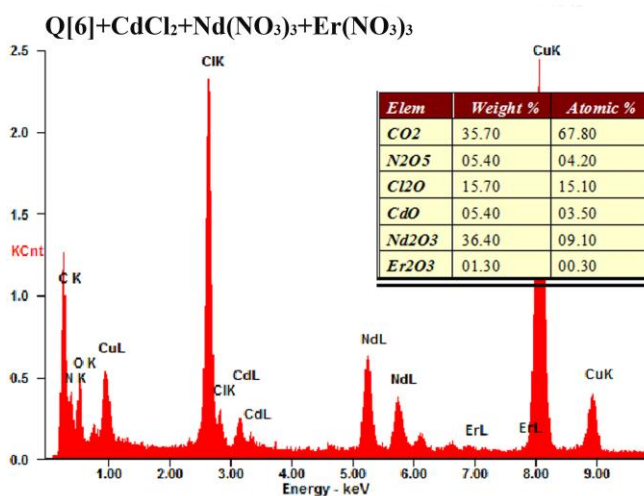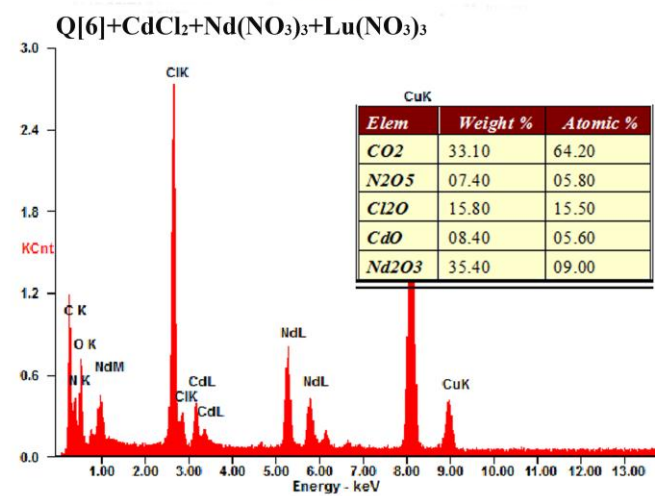

SI-1 The EDS spectra of precipitation in the Ln<sub>light</sub>/Ln<sub>heavy</sub>-Q[6]-[CdCl<sub>4</sub>]<sup>2-</sup> systems.
